# Supplementary material for: Machine Learning Classification of Time since BNT162b2 COVID-19 Vaccination Based on Array-Measured Antibody Activity
Source: MDPI journal article supplement (doi:10.3390/life13061304), 2023-05-31
Supplement: s1 [file s1]

**Table S4.** Intersection results of the optimal feature subsets identified by LASSO, LightGBM, MCFS, and mRMR methods.

| Features in one subset        | Features in two subsets      | Features in three subsets | Features in four subsets       |
|-------------------------------|------------------------------|---------------------------|--------------------------------|
| MoIgA                         | SARS.CoV.2.Spike.RBD.His.HEK | SARS.CoV.2.S2             | SARS.CoV.2.S1.mFcTag           |
| a-HuIgM                       | HuIgG                        | hCoV.HKU1.NP              | MERS.CoV.S1.RBD.367.606.rFcTag |
| a-MoIgA                       | a-HuIgG                      | hCoV.NL63.S1              | SARS.CoV.2.Spike.RBD.His.Bac   |
| Flu.H1N1.HA1                  | a-MoIgG                      | SARS.CoV.2.Spike.RBD.rFc  | SARS.CoV.S1.HisTag             |
| a-HuIgA                       | HuIgM                        | SARS.CoV.2.S1             | SARS.CoV.2.S1.RBD.mFc          |
| hCoV.HKU1.S1                  | Flu.B                        | SARS.CoV.2.S1.HisTag      | SARS.CoV.2.S1+S2               |
| HuIgG_0.03                    | MoIgG                        | SARS.CoV.S1.RBD.HisTag    |                                |
| HuIgG_0.10                    | Flu.H3N2.HA1+HA2             | hCoV.229E.S1              |                                |
| a-HuIgG_0.10                  | HuIgA                        | Flu.H1N1.HA1+HA2          |                                |
| a-HuIgG_0.30                  | MERS.CoV.NP                  |                           |                                |
| HuIgM_0.10                    | SARS.CoV.S1.RBD.rFcTag       |                           |                                |
| a-MoIgG_0.03                  | a-HuIgG_0.03                 |                           |                                |
| hCoV.NL63.S1_S2               | Flu.B_Mal/.HA1               |                           |                                |
| HuIgM_0.03                    | hCoV.OC43.HE                 |                           |                                |
| Flu.B_Phu/.HA1+HA2            | HuIgM_0.30                   |                           |                                |
| MoIgG_0.03                    | SARS.CoV.NP                  |                           |                                |
| Flu.B_Mal/.HA1+HA2            |                              |                           |                                |
| hCoV.OC43.NP                  |                              |                           |                                |
| a-MoIgA_0.03                  |                              |                           |                                |
| Flu.H3N2.HA1                  |                              |                           |                                |
| HuIgA_0.03                    |                              |                           |                                |
| a-MoIgG_0.10                  |                              |                           |                                |
| hCoV.HKU1.S1_S2               |                              |                           |                                |
| MoIgG_0.30                    |                              |                           |                                |
| hCoV.HKU1.S1_AA1.760          |                              |                           |                                |
| Flu.B_Phu/.HA1                |                              |                           |                                |
| MERS.CoV.S1.ECD.1-1297.HisTag |                              |                           |                                |
