# Supplementary material for: Machine Learning Classification of Time since BNT162b2 COVID-19 Vaccination Based on Array-Measured Antibody Activity
Source: MDPI journal article supplement (doi:10.3390/life13061304), 2023-05-31
Supplement: s1 [file s1]

**Table S1.** Feature names and their descriptions

| Antigen ID                     | Virus           | Antigen                                                                            |
|--------------------------------|-----------------|------------------------------------------------------------------------------------|
| SARS.CoV.2.NP                  | SARS-CoV-2      | SARS-CoV-2_NP                                                                      |
| SARS.CoV.2.S1+S2               | SARS-CoV-2      | 2019-nCoV Spike Protein(S1+S2 ECD, His tag)                                        |
| SARS.CoV.2.S2                  | SARS-CoV-2      | 2019-nCoV Spike Protein (S2 ECD, His tag)                                          |
| SARS.CoV.2.S1.mFcTag           | SARS-CoV-2      | 2019-nCoV Spike Protein S1 (mFc Tag)                                               |
| SARS.CoV.2.S1                  | SARS-CoV-2      | SARS-CoV-2_S1(His)                                                                 |
| SARS.CoV.2.S1.HisTag           | SARS-CoV-2      | 2019-nCoV Spike Protein S1 (His Tag)                                               |
| SARS.CoV.2.S1.RBD.mFc          | SARS-CoV-2      | SARS-CoV-2 (2019-nCoV) Spike RBD-mFc Recombinant Protein (HPLC-verified)           |
| SARS.CoV.2.Spike.RBD.His.Bac   | SARS-CoV-2      | SARS-CoV-2 (2019-nCoV) Spike RBD-His Recombinant Protein, Baculovirus-Insect Cells |
| SARS.CoV.2.Spike.RBD.His.HEK   | SARS-CoV-2      | SARS-CoV-2 (2019-nCoV) Spike RBD-His Recombinant Protein, HEK293                   |
| SARS.CoV.2.Spike.RBD.rFc       | SARS-CoV-2      | SARS-CoV-2 (2019-nCoV) Spike RBD-rFc Recombinant Protein                           |
| MERS.CoV.NP                    | MERS            | MERS-CoV (NCoV / Novel coronavirus) Nucleoprotein / NP protein (His Tag)           |
| MERS.CoV.S1.ECD.1-1297.HisTag  | MERS            | MERS-CoV (NCoV / Novel coronavirus) Spike Protein (ECD, aa 1-1297, His Tag)        |
| MERS.CoV.S1.RBD.367.606.rFcTag | MERS            | MERS-CoV_S1-RBD,N-(AA367-606,rFcTag)                                               |
| SARS.CoV.NP                    | SARS            | SARS-CoV_NP(His)                                                                   |
| SARS.CoV.S1.HisTag             | SARS            | SARS-CoV_S1,(HisTag)                                                               |
| SARS.CoV.S1.RBD.HisTag         | SARS            | SARS-CoV_S1-RBD,(HisTag)                                                           |
| SARS.CoV.S1.RBD.rFcTag         | SARS            | SARS-CoV_S1-RBD,rFcTag                                                             |
| hCoV.NL63.S1                   | Common Cold CoV | HCoV-NL63_S1                                                                       |
| hCoV.229E.S1                   | Common Cold CoV | HCoV-229E_S1                                                                       |
| hCoV.OC43.HE                   | Common Cold CoV | HCoV-OC43_HE                                                                       |
| hCoV.NL63.S1_S2                | Common Cold CoV | HCoV-NL63_S1+S2                                                                    |
| hCoV.229E.S1_S2                | Common Cold CoV | HCoV-229E_S1+S2                                                                    |
| hCoV.HKU1.S1_S2                | Common Cold CoV | HCoV-HKU1_S1+S2                                                                    |
| hCoV.OC43.S1_S2ECD.HisTag      | Common Cold CoV | HCoV-OC43_S1+S2 ECD, (His Tag)                                                     |
| hCoV.NL63.NP                   | Common Cold CoV | HCoV-NL63_NP, (His Tag)                                                            |
| hCoV.HKU1.NP                   | Common Cold CoV | HCoV-HKU1_NP, (His Tag)                                                            |
| hCoV.OC43.NP                   | Common Cold CoV | HCoV-OC43_Hemagglutinin esterase Protein (His Tag)                                 |

|                      |                          |                                                                |
|----------------------|--------------------------|----------------------------------------------------------------|
| DcCoV.HKU23.NP       | Common Cold CoV          | DcCoV_HKU23-368F_NP                                            |
| hCoV.HKU1.S1_AA1.760 | Common Cold CoV          | HCoV-HKU1_S1,N-(AA1-760)                                       |
| Flu.B_Mal/.HA1+HA2   | Influenza                | B_B/Malaysia/2506/2004_HA1+HA2                                 |
| Flu.B_Mal/.HA1       | Influenza                | B_B/Malaysia/2506/2004_HA1                                     |
| Flu.H1N1.HA1+HA2     | Influenza                | H1N1_A/Beijing/22808/2009_HA1+HA2                              |
| Flu.H1N1.HA1         | Influenza                | H1N1_A/Beijing/22808/2009_HA1                                  |
| Flu.H3N2.HA1+HA2     | Influenza                | H3N2_A/Texas/50/2012_HA1+HA2                                   |
| Flu.H3N2.HA1         | Influenza                | H3N2_A/Texas/50/2012_HA1                                       |
| Flu.B_Phu/.HA1+HA2   | Influenza                | B_B/Phuket/3073/2013_HA1+HA2                                   |
| Flu.B_Phu/.HA1       | Influenza                | B_B/Phuket/3073/2013_HA1                                       |
| a-HuIgA_0.30         | non-viral immunoglobulin | Anti-Human Immunoglobulin A with a concentration of 0.30 µg/µL |
| a-HuIgA_0.10         | non-viral immunoglobulin | Anti-Human Immunoglobulin A with a concentration of 0.10 µg/µL |
| a-HuIgA_0.03         | non-viral immunoglobulin | Anti-Human Immunoglobulin A with a concentration of 0.03 µg/µL |
| a-HuIgG_0.30         | non-viral immunoglobulin | Anti-Human Immunoglobulin G with a concentration of 0.30 µg/µL |
| a-HuIgG_0.10         | non-viral immunoglobulin | Anti-Human Immunoglobulin G with a concentration of 0.10 µg/µL |
| a-HuIgG_0.03         | non-viral immunoglobulin | Anti-Human Immunoglobulin G with a concentration of 0.03 µg/µL |
| a-HuIgM_0.30         | non-viral immunoglobulin | Anti-Human Immunoglobulin M with a concentration of 0.30 µg/µL |
| a-HuIgM_0.10         | non-viral immunoglobulin | Anti-Human Immunoglobulin M with a concentration of 0.10 µg/µL |
| a-HuIgM_0.03         | non-viral immunoglobulin | Anti-Human Immunoglobulin M with a concentration of 0.03 µg/µL |
| a-MoIgA_0.30         | non-viral immunoglobulin | Anti-Mouse Immunoglobulin A with a concentration of 0.30 µg/µL |
| a-MoIgA_0.10         | non-viral immunoglobulin | Anti-Mouse Immunoglobulin A with a concentration of 0.10 µg/µL |
| a-MoIgA_0.03         | non-viral immunoglobulin | Anti-Mouse Immunoglobulin A with a concentration of 0.03 µg/µL |
| a-MoIgG_0.30         | non-viral immunoglobulin | Anti-Mouse Immunoglobulin G with a concentration of 0.30 µg/µL |
| a-MoIgG_0.10         | non-viral immunoglobulin | Anti-Mouse Immunoglobulin G with a concentration of 0.10 µg/µL |
| a-MoIgG_0.03         | non-viral immunoglobulin | Anti-Mouse Immunoglobulin G with a concentration of 0.03 µg/µL |
| a-MoIgM_0.30         | non-viral immunoglobulin | Anti-Mouse Immunoglobulin M with a concentration of 0.30 µg/µL |
| a-MoIgM_0.10         | non-viral immunoglobulin | Anti-Mouse Immunoglobulin M with a concentration of 0.10 µg/µL |
| a-MoIgM_0.03         | non-viral immunoglobulin | Anti-Mouse Immunoglobulin M with a concentration of 0.03 µg/µL |
| HuIgA_0.30           | non-viral immunoglobulin | Human Immunoglobulin A with a concentration of 0.30 µg/µL      |
| HuIgA_0.10           | non-viral immunoglobulin | Human Immunoglobulin A with a concentration of 0.10 µg/µL      |

|            |                          |                                                           |
|------------|--------------------------|-----------------------------------------------------------|
| HuIgA_0.03 | non-viral immunoglobulin | Human Immunoglobulin A with a concentration of 0.03 µg/µL |
| HuIgG_0.30 | non-viral immunoglobulin | Human Immunoglobulin G with a concentration of 0.30 µg/µL |
| HuIgG_0.10 | non-viral immunoglobulin | Human Immunoglobulin G with a concentration of 0.10 µg/µL |
| HuIgG_0.03 | non-viral immunoglobulin | Human Immunoglobulin G with a concentration of 0.03 µg/µL |
| HuIgM_0.30 | non-viral immunoglobulin | Human Immunoglobulin M with a concentration of 0.30 µg/µL |
| HuIgM_0.10 | non-viral immunoglobulin | Human Immunoglobulin M with a concentration of 0.10 µg/µL |
| HuIgM_0.03 | non-viral immunoglobulin | Human Immunoglobulin M with a concentration of 0.03 µg/µL |
| MoIgA_0.30 | non-viral immunoglobulin | Mouse Immunoglobulin A with a concentration of 0.30 µg/µL |
| MoIgA_0.10 | non-viral immunoglobulin | Mouse Immunoglobulin A with a concentration of 0.10 µg/µL |
| MoIgA_0.03 | non-viral immunoglobulin | Mouse Immunoglobulin A with a concentration of 0.03 µg/µL |
| MoIgG_0.30 | non-viral immunoglobulin | Mouse Immunoglobulin G with a concentration of 0.30 µg/µL |
| MoIgG_0.10 | non-viral immunoglobulin | Mouse Immunoglobulin G with a concentration of 0.10 µg/µL |
| MoIgG_0.03 | non-viral immunoglobulin | Mouse Immunoglobulin G with a concentration of 0.03 µg/µL |
| MoIgM_0.30 | non-viral immunoglobulin | Mouse Immunoglobulin M with a concentration of 0.30 µg/µL |
| MoIgM_0.10 | non-viral immunoglobulin | Mouse Immunoglobulin M with a concentration of 0.10 µg/µL |
| MoIgM_0.03 | non-viral immunoglobulin | Mouse Immunoglobulin M with a concentration of 0.03 µg/µL |
